# Supplementary material for: Dose-Dependent Effects on Sphingoid Bases and Cytokines in Chickens Fed Diets Prepared with Fusarium Verticillioides Culture Material Containing Fumonisins
Source: PubMed Central journal article supplement (PMC4417966; doi:10.3390/toxins7041253), 2015-04-13
Supplement: toxins-07-01253-s001.pdf [file toxins-07-01253-s001.pdf]

# Supplementary Materials

**Table S1.** Concentrations of sphinganine (Sa) and sphingosine (So) in non-intestinal and intestinal tissues.

| Sphingoid bases            | Liver           |                  | Kidney       |               | Jejunum       |             | Ileum          |               | Cecum        |             |
|----------------------------|-----------------|------------------|--------------|---------------|---------------|-------------|----------------|---------------|--------------|-------------|
|                            | d10             | d20              | d10          | d20           | d10           | d20         | d10            | d20           | d10          | d20         |
| <b>Sa (ng/g)</b>           |                 |                  |              |               |               |             |                |               |              |             |
| <b>0.4 mg/kg</b>           | 674 ± 119       | 658 ± 140        | 172 ± 30     | 111 ± 15      | 237 ± 42      | 210 ± 15    | 168 ± 16       | 231 ± 29      | 722 ± 171    | 742 ± 222   |
| <b>5.6 mg/kg</b>           | 803 ± 178       | 542 ± 125        | 124 ± 18     | 76 ± 12       | 244 ± 21      | 288 ± 32    | 445 ± 134      | 268 ± 91      | 640 ± 154    | 268 ± 94    |
| <b>11.3 mg/kg</b>          | 1434 ± 202      | 661 ± 83         | 157 ± 17     | 140 ± 34      | 277 ± 31      | 323 ± 57    | 943 ± 254      | 574 ± 255     | 744 ± 136    | 141 ± 29    |
| <b>17.5 mg/kg</b>          | 1890 ± 181 **   | 1346 ± 108 *     | 264 ± 50     | 146 ± 30      | 638 ± 122     | 586 ± 97 *  | 2885 ± 207 *** | 2751 ± 638 *  | 2191 ± 262 * | 428 ± 79    |
| <b>47.8 mg/kg</b>          | 10795 ± 2698 *  | 14530 ± 2042 **  | 2636 ± 712   | 1463 ± 346 *  | 1311 ± 420    | 1164 ± 477  | 6640 ± 739 **  | 5345 ± 1585 * | 1378 ± 279   | 765 ± 164   |
| <b>104.8 mg/kg</b>         | 23503 ± 2572 ** | 21214 ± 1756 *** | 5851 ± 1702  | 5639 ± 2196 * | 2143 ± 476 *  | 1198 ± 376  | 7741 ± 2284 *  | 6862 ± 1139 * | 2424 ± 478 * | 581 ± 63    |
| Probability of diet effect | $p < 0.001$     | $p < 0.001$      | $p < 0.001$  | $p = 0.001$   | $p < 0.001$   | $p = 0.022$ | $p < 0.001$    | $p < 0.001$   | $p < 0.001$  | $p = 0.006$ |
| <b>So (ng/g)</b>           |                 |                  |              |               |               |             |                |               |              |             |
| <b>0.4 mg/kg</b>           | 4620 ± 662      | 4816 ± 730       | 1139 ± 151   | 895 ± 120     | 750 ± 36      | 1340 ± 205  | 919 ± 73       | 1274 ± 75     | 4433 ± 1308  | 2925 ± 596  |
| <b>5.6 mg/kg</b>           | 3390 ± 272      | 3045 ± 384       | 847 ± 60     | 501 ± 86      | 1121 ± 86 *   | 1185 ± 160  | 1349 ± 185     | 907 ± 124     | 4734 ± 1265  | 1396 ± 343  |
| <b>11.3 mg/kg</b>          | 4330 ± 506      | 3443 ± 280       | 1196 ± 105   | 980 ± 171     | 970 ± 90      | 1186 ± 213  | 1822 ± 179 **  | 1121 ± 90     | 3492 ± 867   | 1120 ± 289  |
| <b>17.5 mg/kg</b>          | 4756 ± 390      | 4381 ± 158       | 1266 ± 98    | 750 ± 181     | 934 ± 84      | 1010 ± 182  | 1459 ± 141 *   | 1481 ± 76     | 5145 ± 515   | 1203 ± 185  |
| <b>47.8 mg/kg</b>          | 5748 ± 1143     | 8741 ± 793 *     | 3979 ± 907   | 2587 ± 551 ** | 1299 ± 124 ** | 1128 ± 121  | 1823 ± 84 **   | 2305 ± 296    | 2565 ± 813   | 2015 ± 451  |
| <b>104.8 mg/kg</b>         | 10797 ± 1056 ** | 9698 ± 625 **    | 3853 ± 485 * | 2659 ± 411 ** | 1109 ± 124 *  | 1163 ± 237  | 1818 ± 159 **  | 2441 ± 237 *  | 4189 ± 910   | 1445 ± 95   |
| Probability of diet effect | $p < 0.001$     | $p < 0.001$      | $p < 0.001$  | $p < 0.001$   | $p = 0.008$   | $p = 0.900$ | $p < 0.001$    | $p < 0.001$   | $p = 0.497$  | $p = 0.013$ |

Values are mean ± SEM for six animals. \*  $p \leq 0.05$ ; \*\*  $p \leq 0.01$ ; \*\*\*  $p \leq 0.001$  compared to control group.
